# Supplementary material
Source: PubMed Central journal article supplement (PMC5662147)
Supplement: NIHMS73975-supplement-Supplementary_Information.pdf [file NIHMS73975-supplement-Supplementary_Information.pdf]

Supplementary information

**Endogenous miRNA in the green alga *Chlamydomonas* regulates gene expression through CDS-targeting.**

Betty Y-W. Chung\*<sup>1</sup>, Michael J. Deery<sup>2</sup>, Arnoud J. Groen<sup>2</sup>, Julie Howard<sup>2</sup> and David Baulcombe\*<sup>1</sup>.

\* **Corresponding Authors:** [bcy23@cam.ac.uk](mailto:bcy23@cam.ac.uk), [dcb40@cam.ac.uk](mailto:dcb40@cam.ac.uk)

<sup>1</sup> Department of Plant Sciences, University of Cambridge, Cambridge, CB2 3EA, United Kingdom

<sup>2</sup> Cambridge System Biology Centre and Department of Biochemistry, University of Cambridge, CB2 1GA, United Kingdom

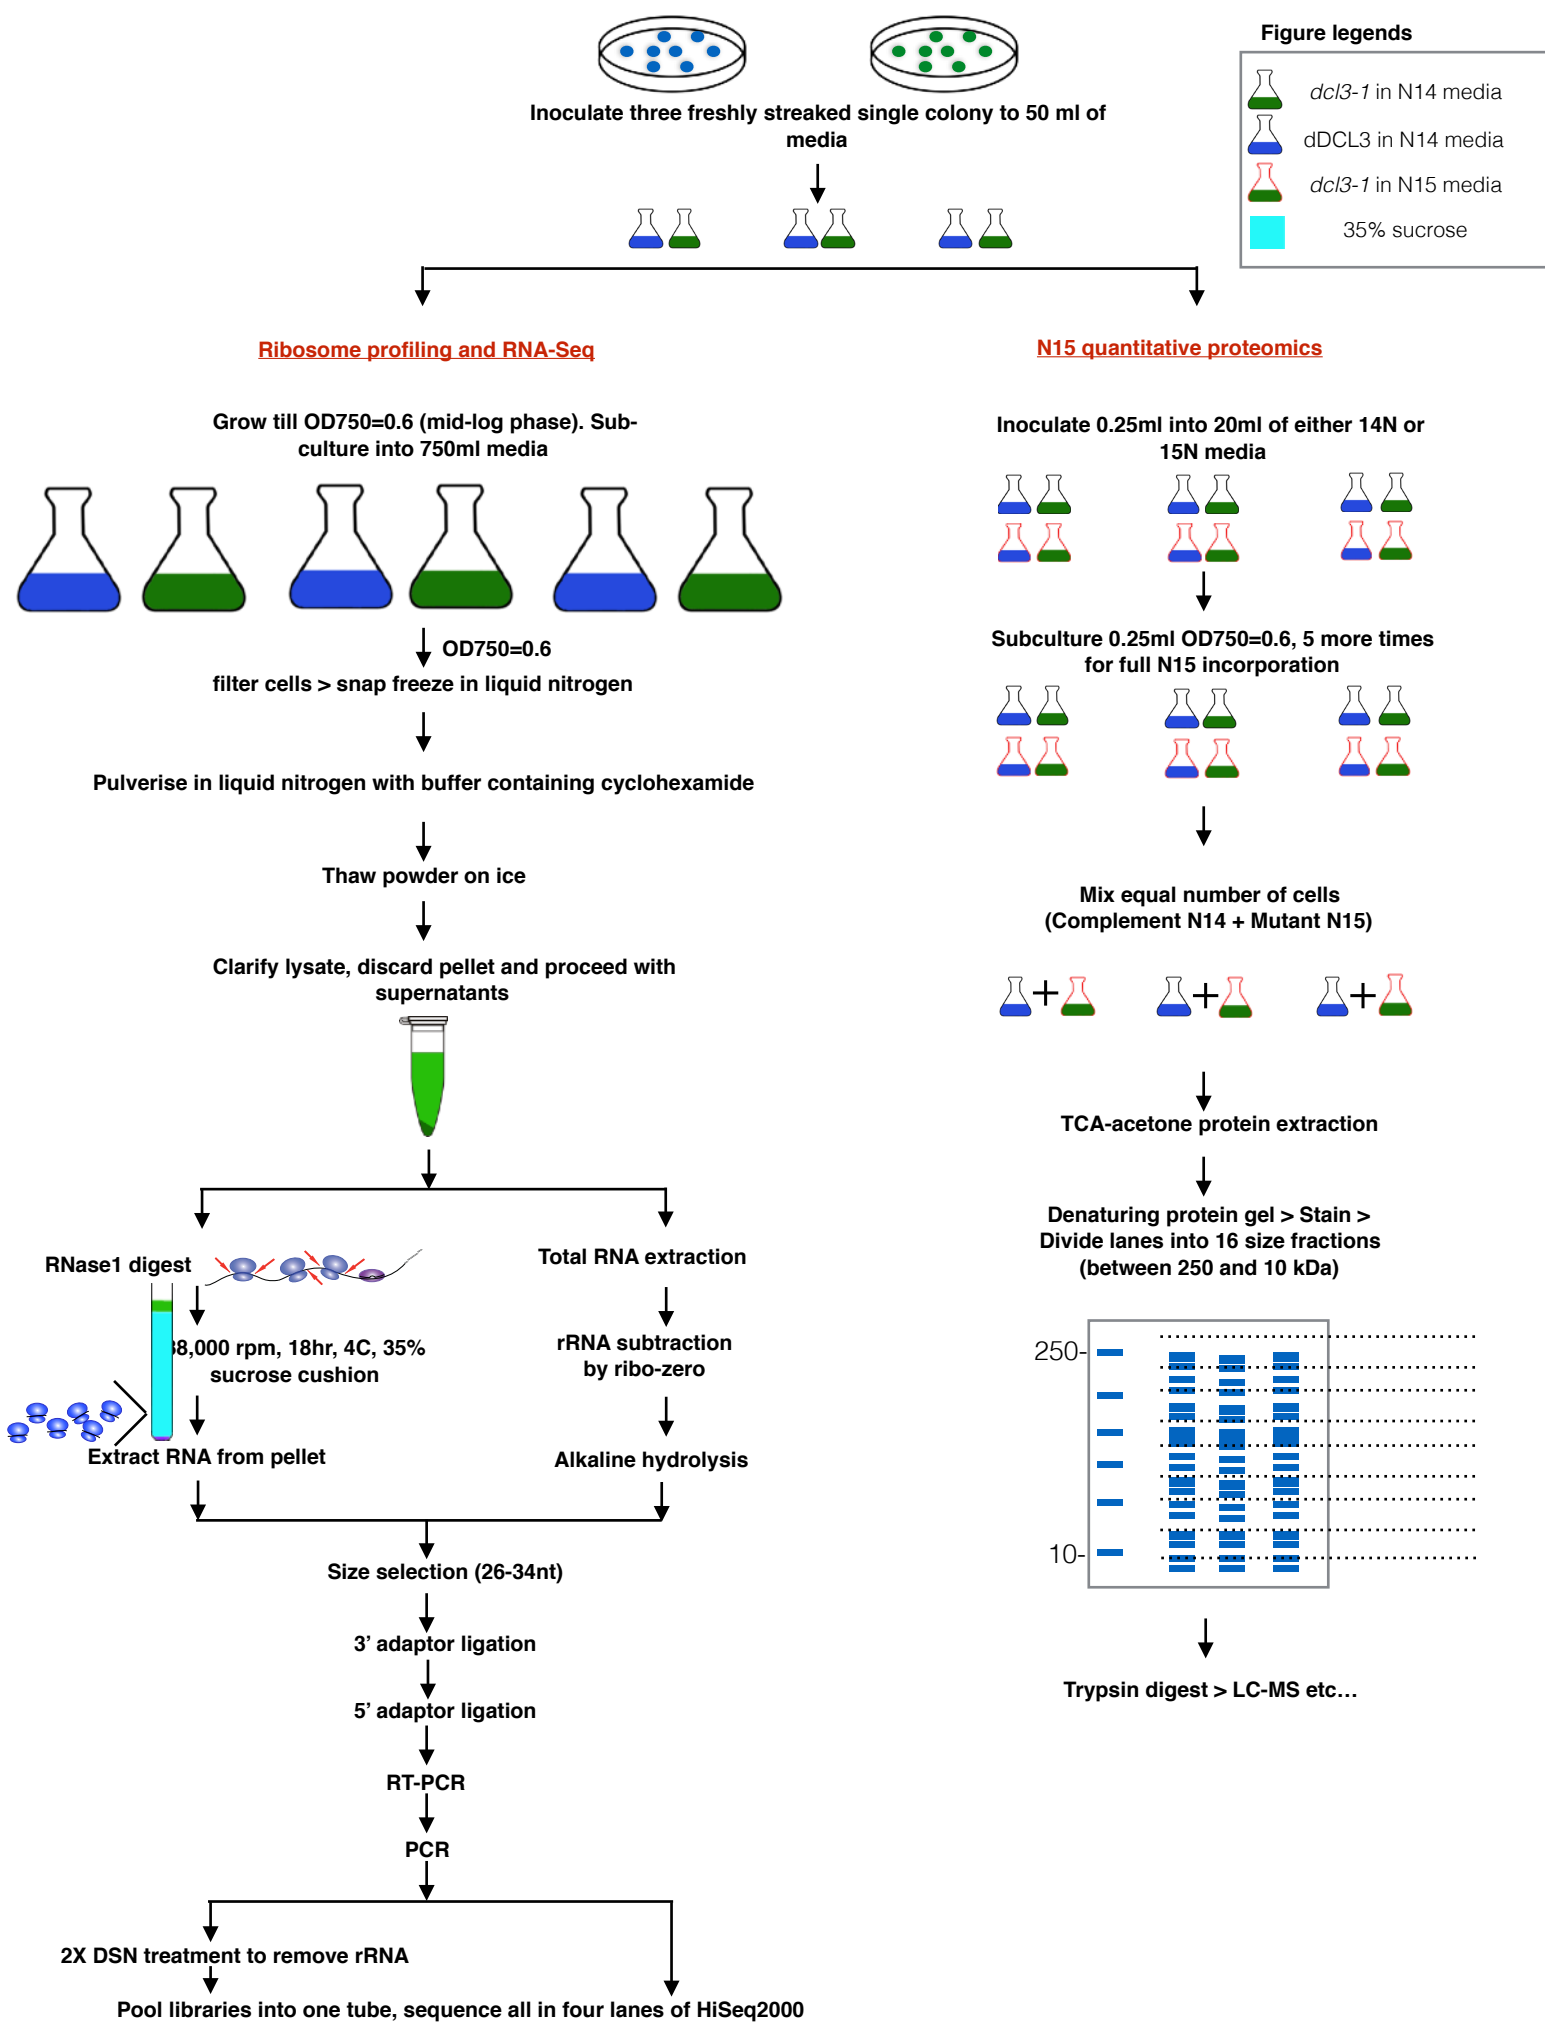

### Supplementary Figure 1. Experimental workflow

Three independent single colonies from freshly streaked *Chlamydomonas dcl3-1* (green) or complement (blue) were inoculated into 50 mL of TAP media and grown until OD750 = 0.6 (mid-log phase). 0.25 mL of each culture was used for N15 incorporation for whole cell proteomics and the remaining culture was used to sub-culture 750 mL of TAP for ribosome profiling.

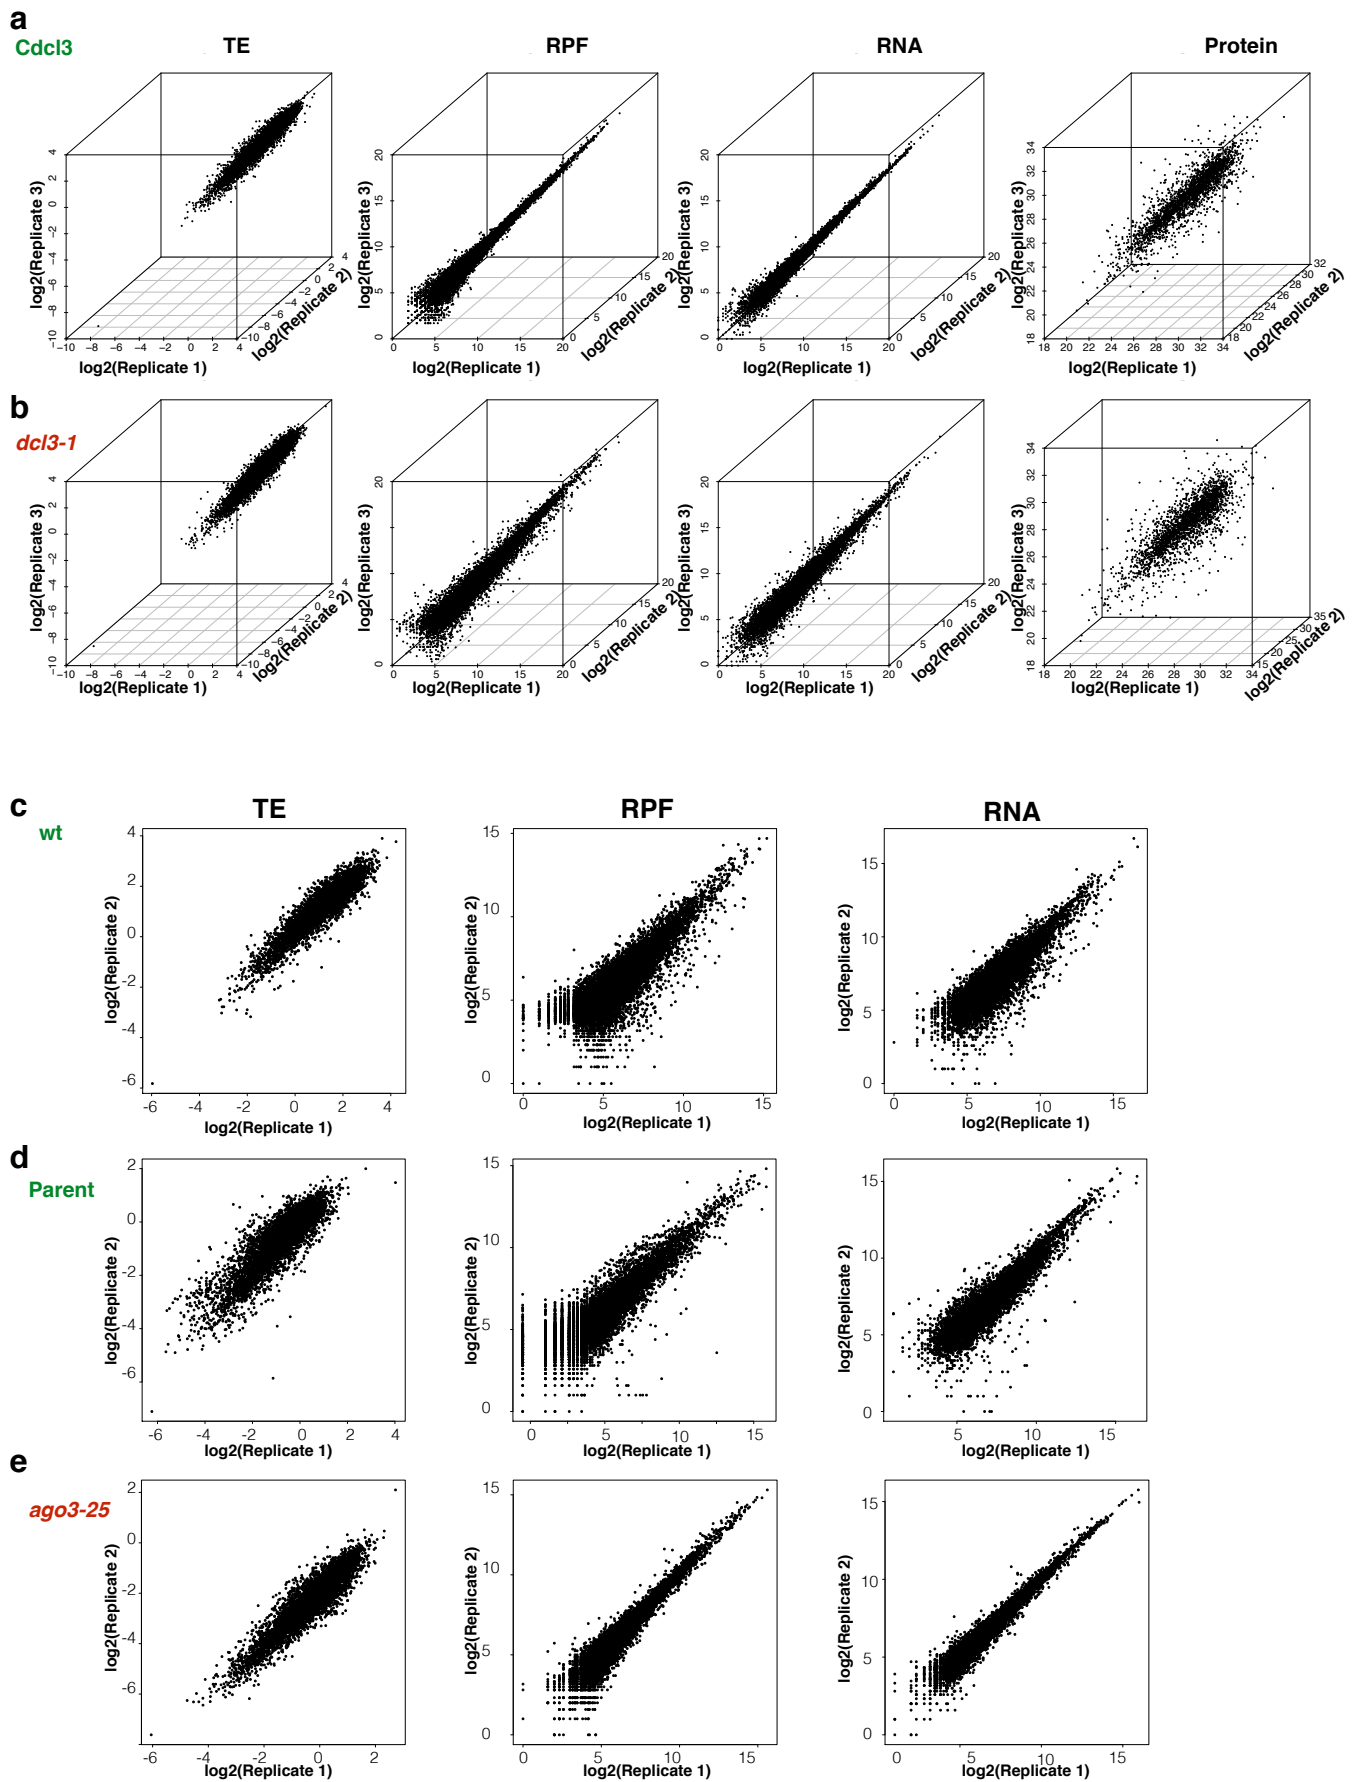

**Supplementary Figure 2. Reproducibility of TE, ribosome profiling, RNA-Seq and N15 Proteomics**

(A)-(E) Correspondence between biological triplicates for *Cdcl3*, *dcl3-1* and replicates for wt, Parent and *ago3-25*, respectively.

**Supplementary Table 1: Number of reads mapping to nuclear-encoded transcripts for each library (Phytozome 281).**

|         |            | biorep 1  | biorep 2  | biorep 3  |
|---------|------------|-----------|-----------|-----------|
| RiboSeq | Complement | 368,613   | 291,373   | 444,768   |
|         | DCL3       | 515,717   | 461,013   | 590,953   |
| RNA-seq | Complement | 908,865   | 1,114,867 | 1,223,427 |
|         | DCL3       | 1,166,393 | 1,183,071 | 679,375   |

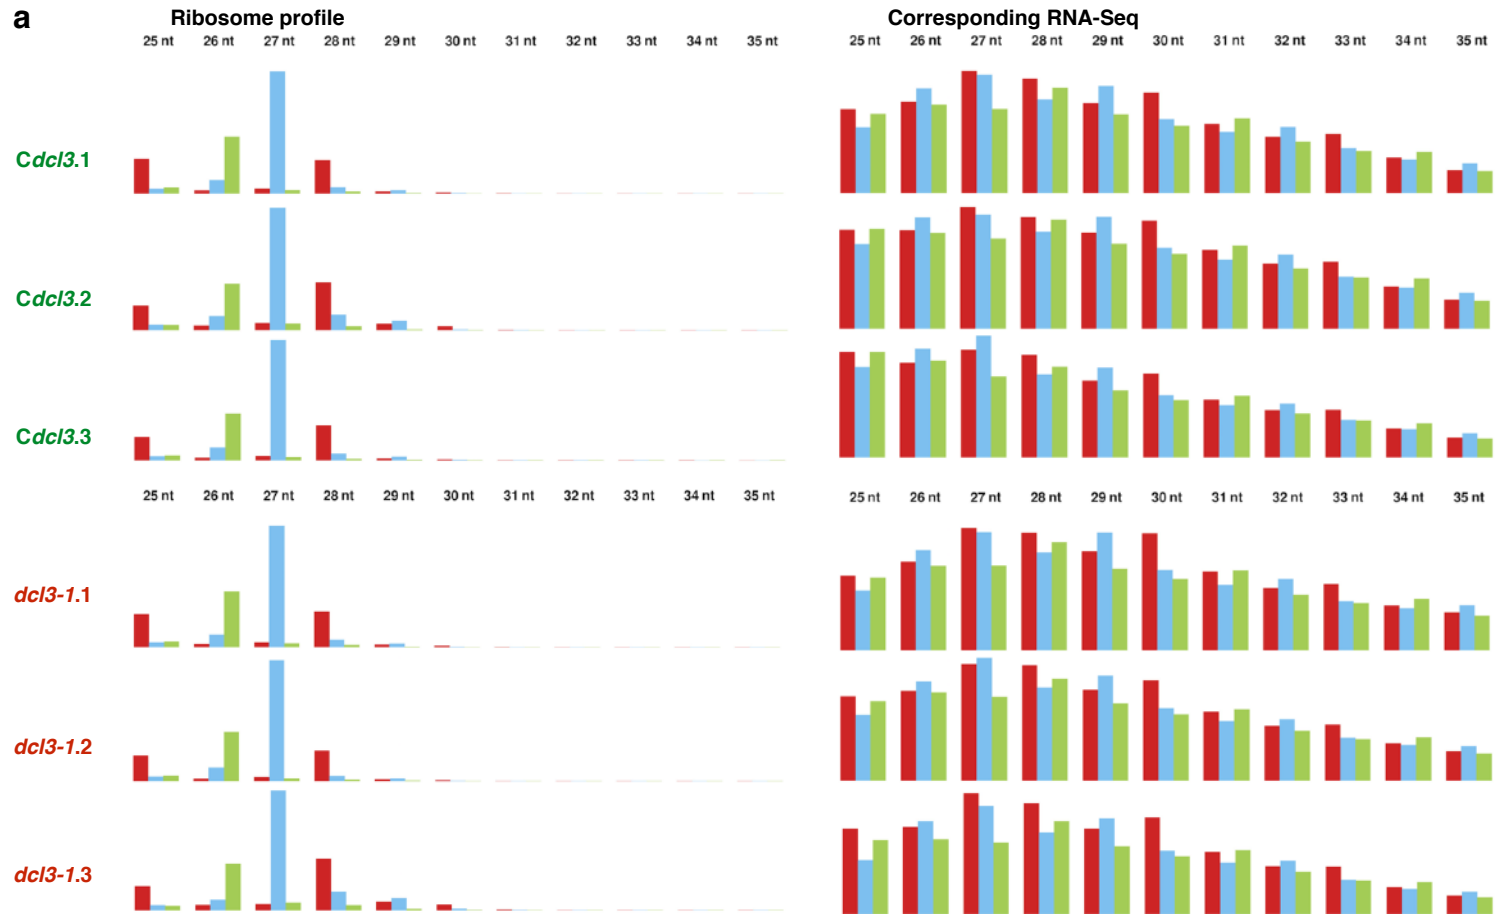

**Supplementary Figure 3: Generation of precise ribosome profiling data:**

(a) Histogram of positions for all biological triplicates to which the 5' ends of ribosome profile footprints (RPFs) and corresponding RNA-Seq reads map, respectively, as a function of read size class (nt), for reads mapping to the interior region of nuclear-encoded coding ORFs. Red, green and blue bars indicate the proportion of reads that map to codon positions 0, 1 and 2 (respectively).

**b****Ribo-Seq****Biorep 1****Biorep 2****Biorep 3***Cdcl3* (27 nt)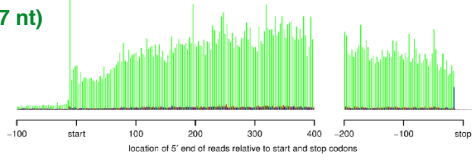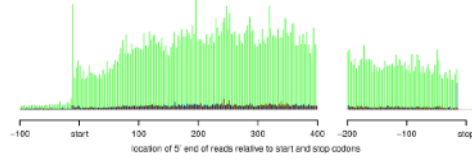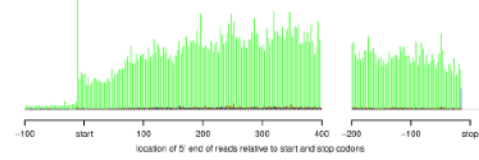*dcl3-1* (27 nt)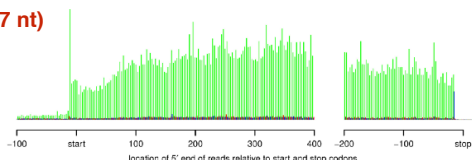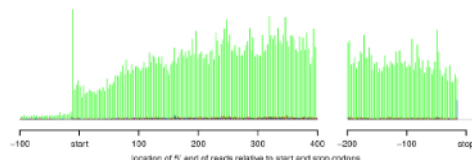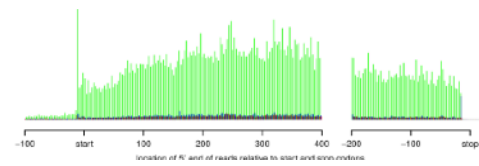*Cdcl3* (28 nt)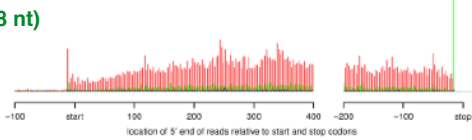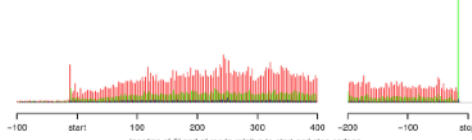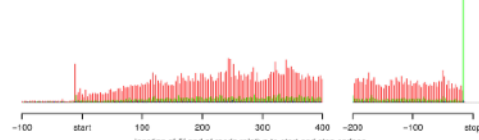*dcl3-1* (28 nt)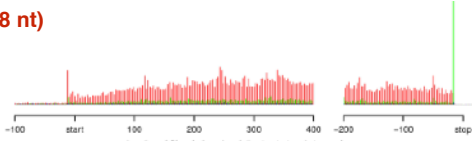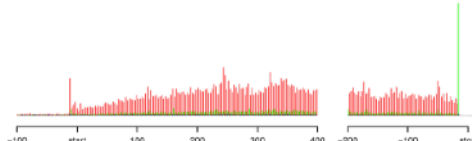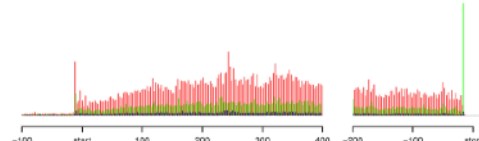**RNA-Seq***Cdcl3* (all sizes)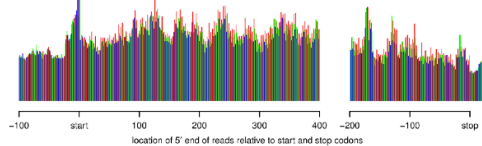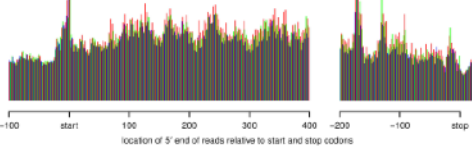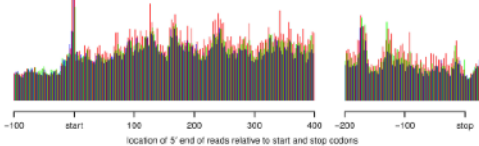*dcl3-1* (All sizes)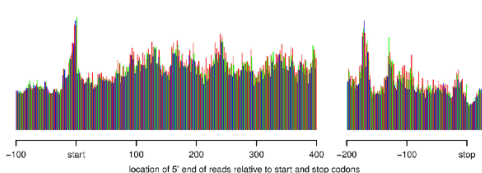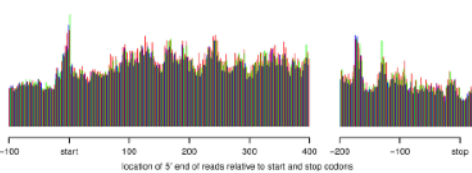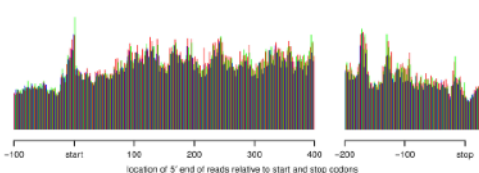**Supplementary Figure 3: Generation of precise ribosome profiling data:**

(b) Histogram of 5' end positions of 27 and 28-nt RPFs and RNA-seq (all sizes) relative to start and stop codons for all biological triplicates. Reads were derived from *Cdcl3* or *dcl3-1* (respectively) and summed over all transcripts. Phasing is indicated using the same colors as in supplementary figure 3A.

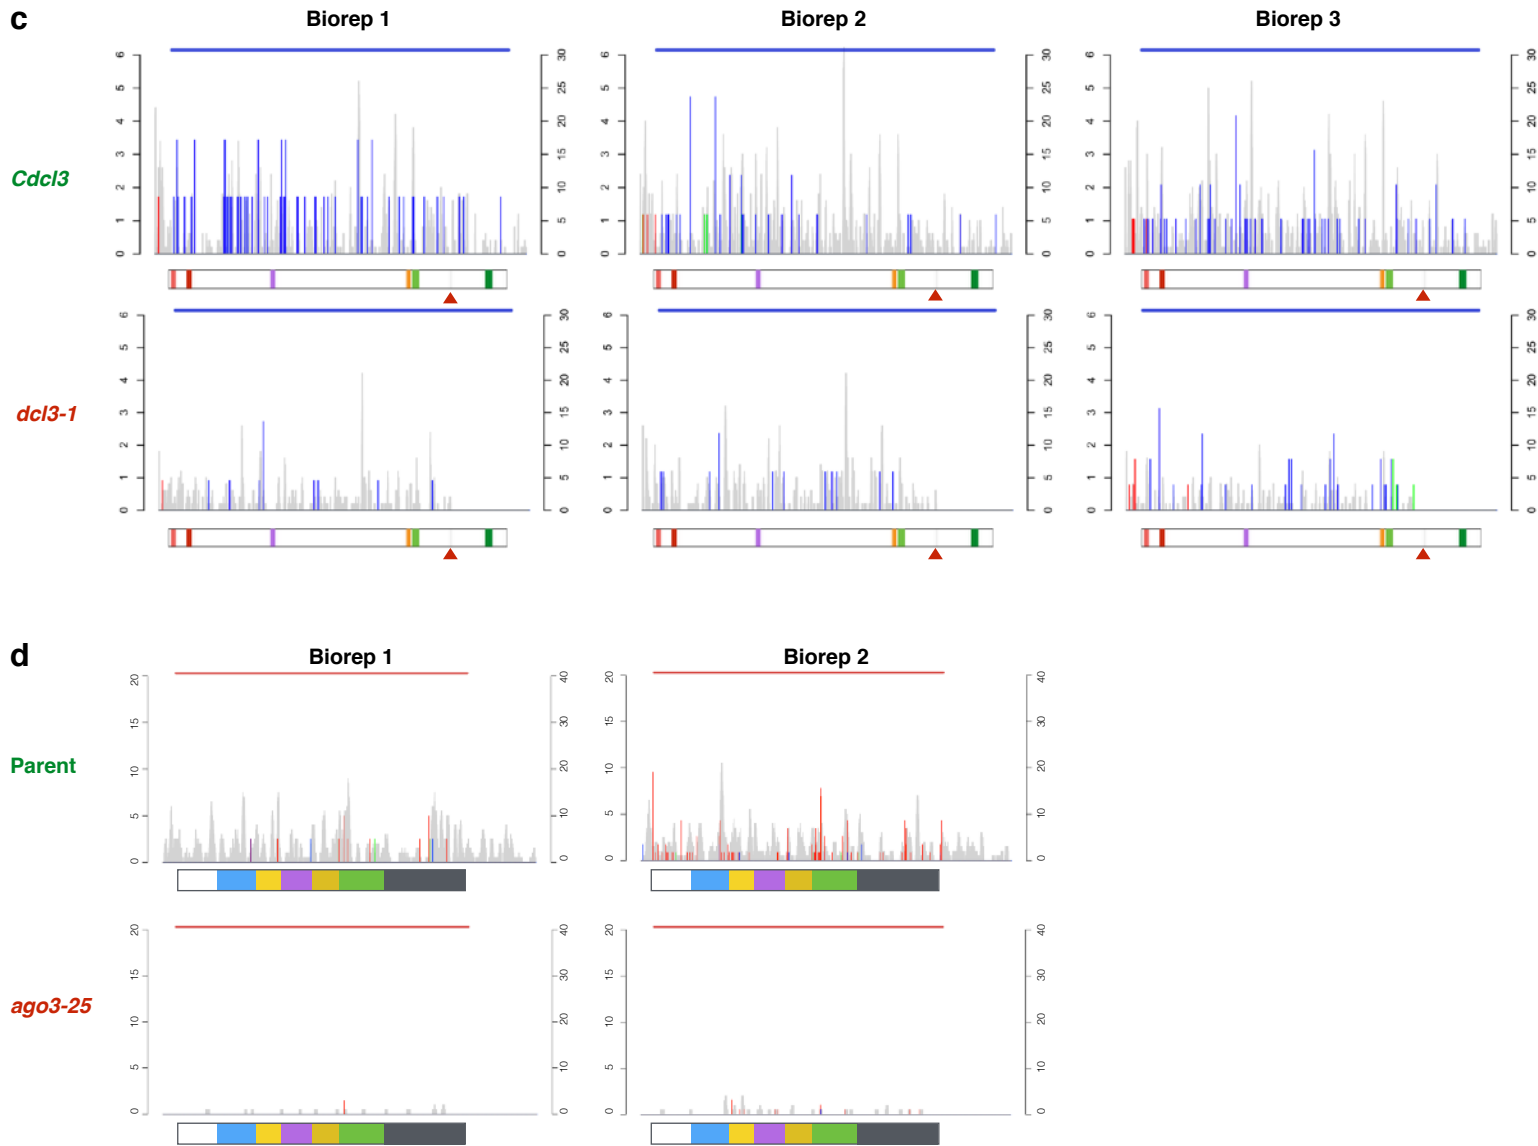

**Supplementary Figure 3: Generation of precise ribosome profiling data:**

(c) 27-nt reads mapped to DCL3 transcripts in all biological triplicates. The blue horizontal line indicates the CDS (612-12,830 nt). The schematic below the plot shows the domain organisation of DCL3 which contains two DEAD/DEAH box helicase domains (light and dark red boxes), a Helicase domain (purple box), a proline-rich domain (orange box) and two Ribonuclease III domains a and b (light and dark green boxes, respectively). The thin grey line and the corresponding red arrow indicates the Hygromycin insertion site (nt 10,193).

(d) 27-nt reads mapped to AGO3 transcripts in all biological replicates. The red horizontal line indicates the CDS. The schematic below the plot shows the domain organisation of AGO3 which contains N-terminal domain (blue), L1 and L2 (light and dark yellow, respectively), PAZ domain (purple), MID domain (green) and the PIWI domain (grey) (Chung *et al.* 2017 submitted).

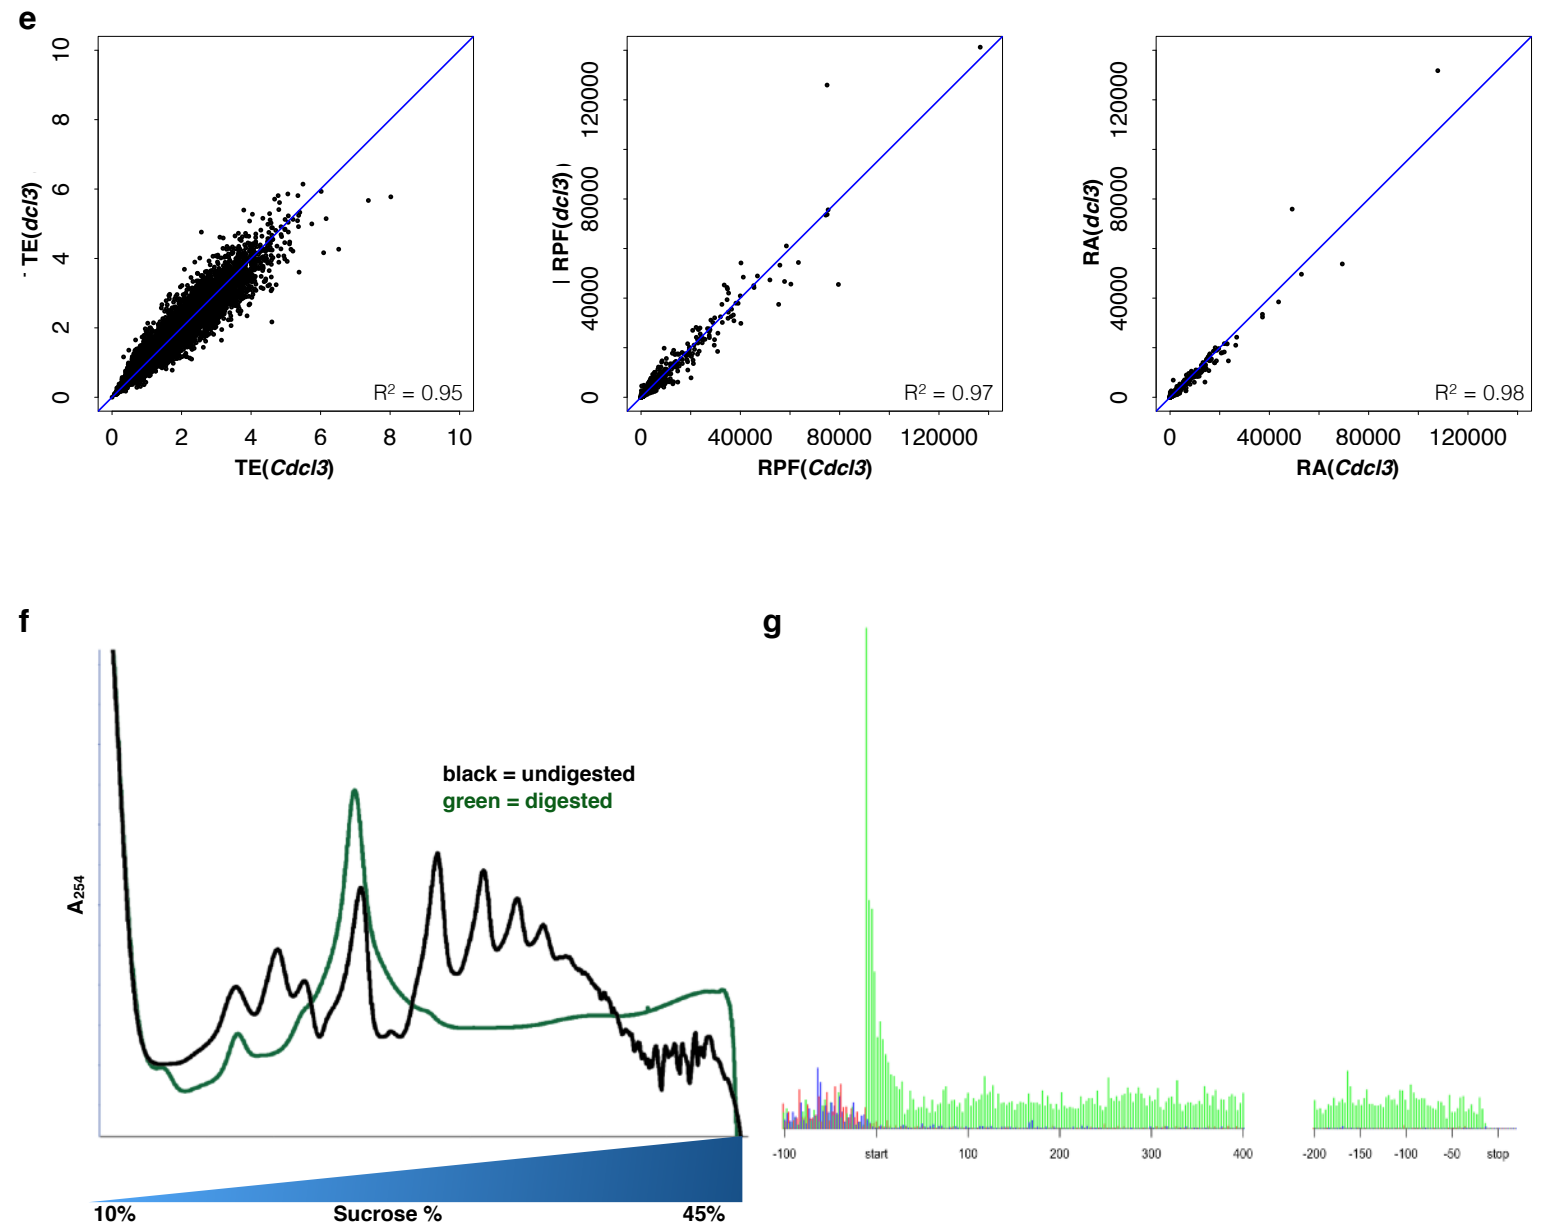

**Supplementary Figure 3: Generation of precise ribosome profiling data:**

(e) Correlation of TE, RPF and RNA (averaged over biological repeats) between *dcl3-1* and *Cdcl3* for all expressed genes. Blue lines represent a perfect correlation. Spearman correlation coefficients are indicated in bottom right corners.

(f) Typical polysome profile of undigested (black) and digested (green) lysates in this study.

(g) Histogram of 5' end positions of 27-nt RPFs relative to start and stop codons for *Cdcl3* culture pre-treated with 100  $\mu\text{g/ml}$  cyclohexamide for 5 min prior to harvesting for ribosome profiling. Phasing is indicated using the same colors as in supplementary figure 3A.

**Supplementary Table 2: Re-annotation of miRNA precursor-containing mRNAs.**

| <b>CDS-exons</b> | <b>CDS-Introns</b> | <b>3'UTR-exon</b> | <b>3'UTR-intron</b> |
|------------------|--------------------|-------------------|---------------------|
| Cre05.g239950    | Cre04.g229050      | Cre14.g623850     | Cre08.g358535       |
|                  | Cre01.g035500      | Cre02.g089850     |                     |
|                  | Cre04.g225700      | Cre02.g143427     |                     |
|                  | Cre06.g274550      | Cre02.g143527     |                     |
|                  | Cre06.g296983      | Cre03.g195950     |                     |
|                  | Cre07.g328400      | Cre05.g242301     |                     |
|                  | Cre07.g354150      | Cre10.g465000     |                     |
|                  | Cre12.g537671      | Cre13.g576700     |                     |
|                  | Cre14.g629200      | Cre13.g585175     |                     |
|                  | Cre01.g035500      | Cre13.g585200     |                     |
|                  | Cre02.g143327      | Cre16.g694950     |                     |
|                  | Cre04.g217925      | Cre02.g143527     |                     |
|                  | Cre04.g229050      | Cre24.g755697     |                     |
|                  | Cre08.g358537      | Cre02.g143527     |                     |
|                  | Cre09.g406983      | Cre13.g576700     |                     |
|                  | Cre16.g647602      | Cre16.g694950     |                     |
|                  | Cre07.g341100      | Cre24.g755697     |                     |
|                  |                    | Cre07.g352150     |                     |
|                  |                    | Cre06.g294776     |                     |
|                  |                    | Cre10.g444300     |                     |
|                  |                    | Cre01.g051050     |                     |



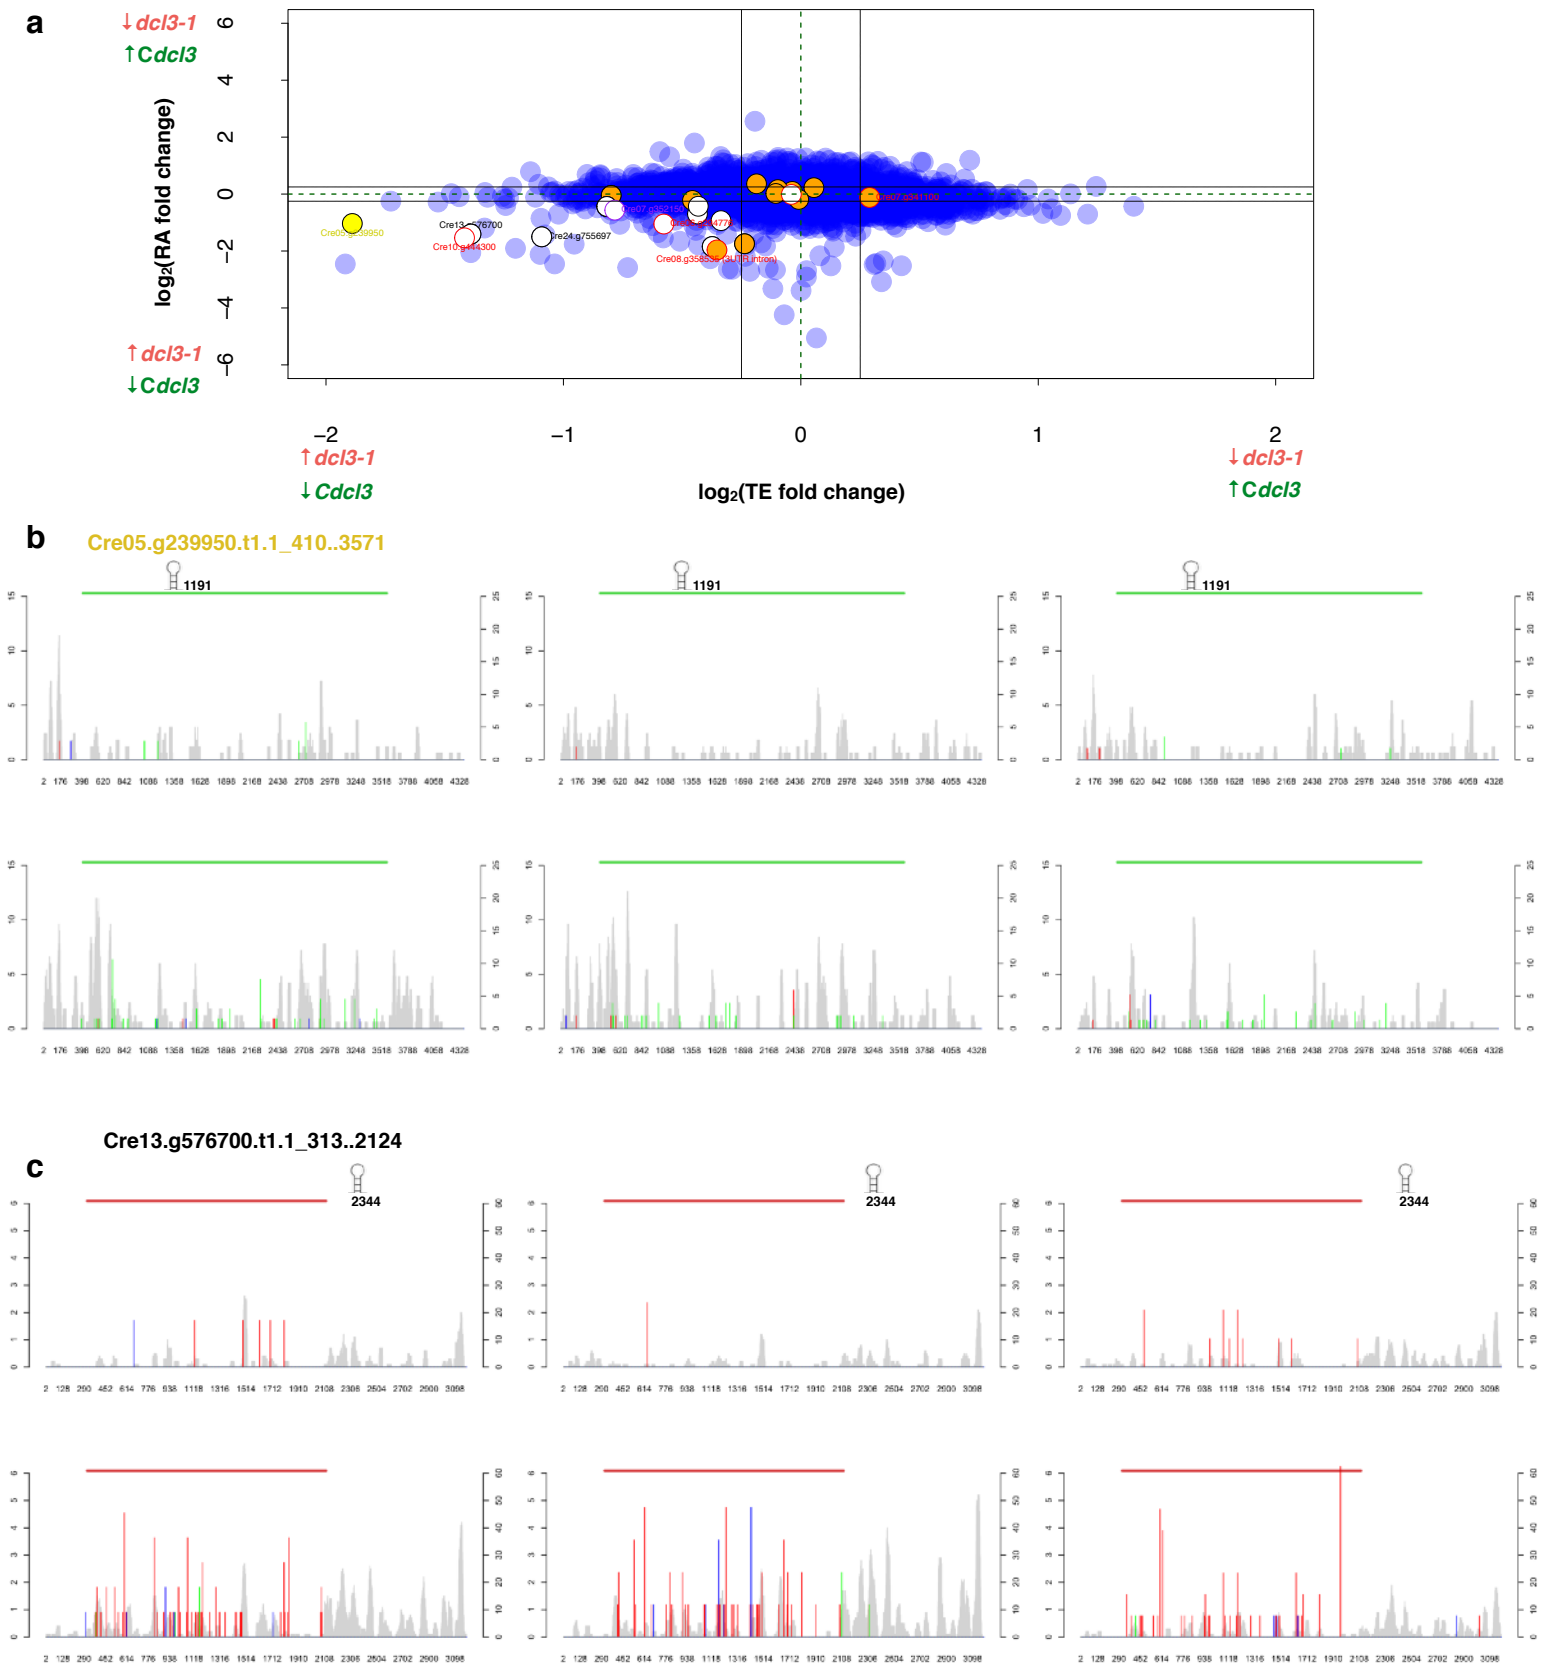

**Supplementary Figure 4. DCL3-dependent processing of miRNA down-regulates translation efficiency**

(a) Scatter plot of  $\log_2$  fold changes of all mRNAs for TE and RA fold-changes between *dcl3-1* and *Cdcl3*. New annotation for precursor-containing transcripts: yellow circle = precursor-containing CDS, white circles = precursor-containing 3'UTRs, orange circles = precursor-containing introns, white circles with red outlines = transcripts previously annotated as non-coding transcripts but which are in fact coding and contain a miRNA precursor in the 3'UTR. Pearson correlation = 0.072 and 0.486 for intron- and exon-containing transcripts respectively.

(b)-(e) Histogram of normalised 5' end positions of 27-nt RPFs relative to start and stop codons (colour) and corresponding RNA-seq reads (grey) for miRNA-precursor containing transcripts. Reads were derived from the complement or DCL3 mutant (top and bottom in biological triplicates, respectively) and summed over all transcripts.

**d****Cre24.g755697.t1.1\_136..2328**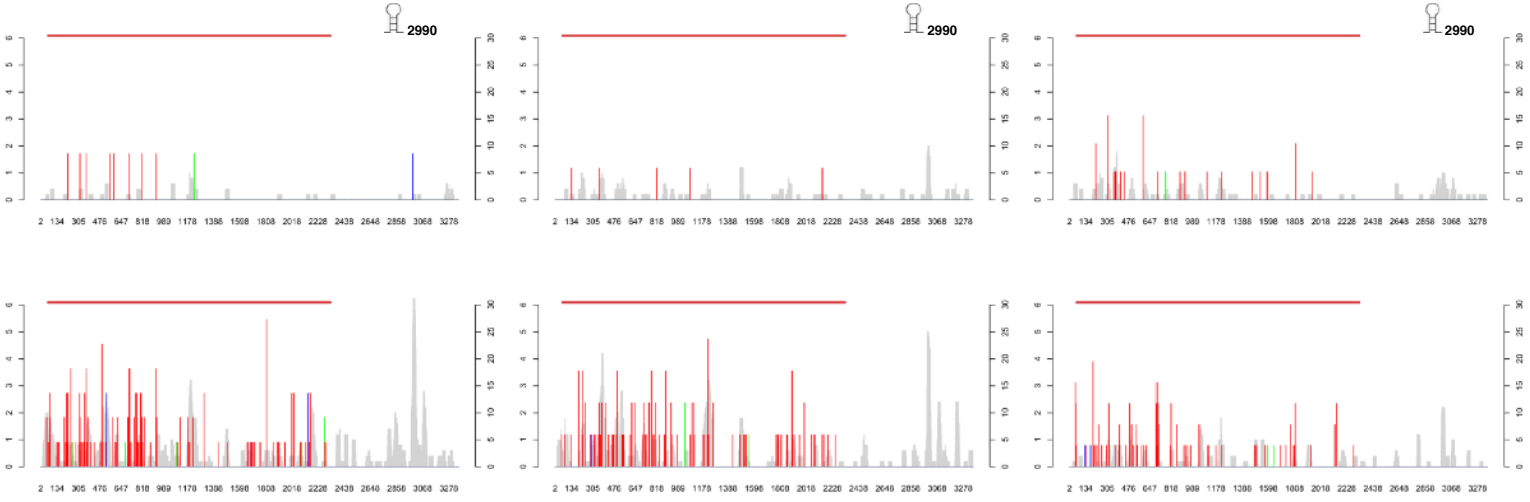**e****Cre10.g444300.t1.2\_241..810**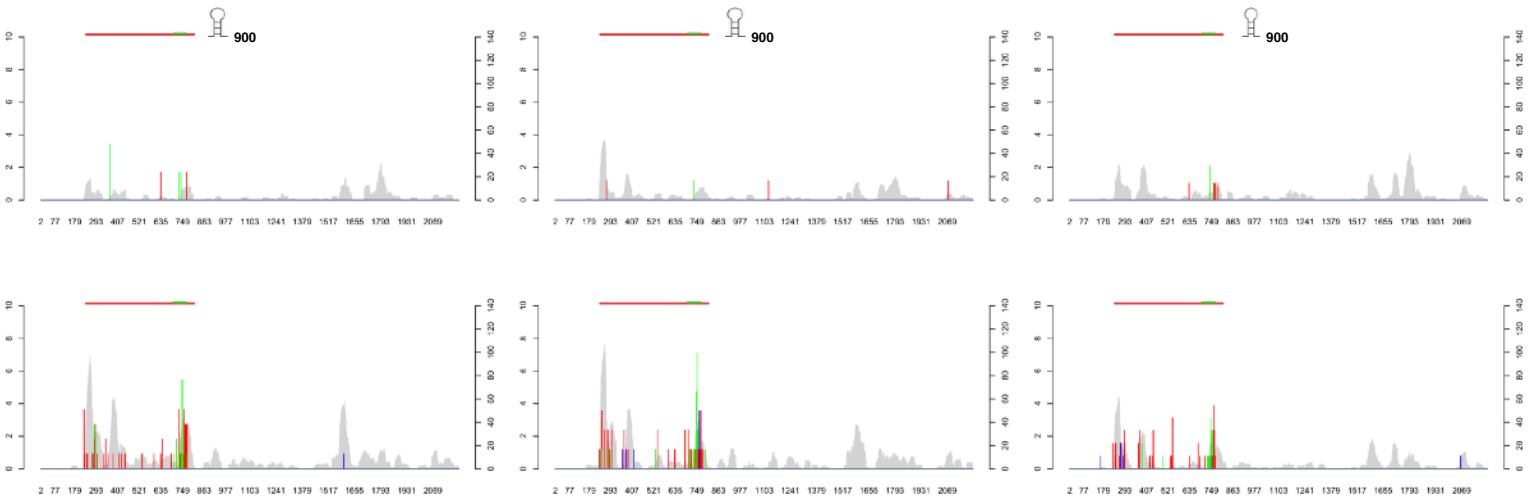

## Supplementary Figure 5

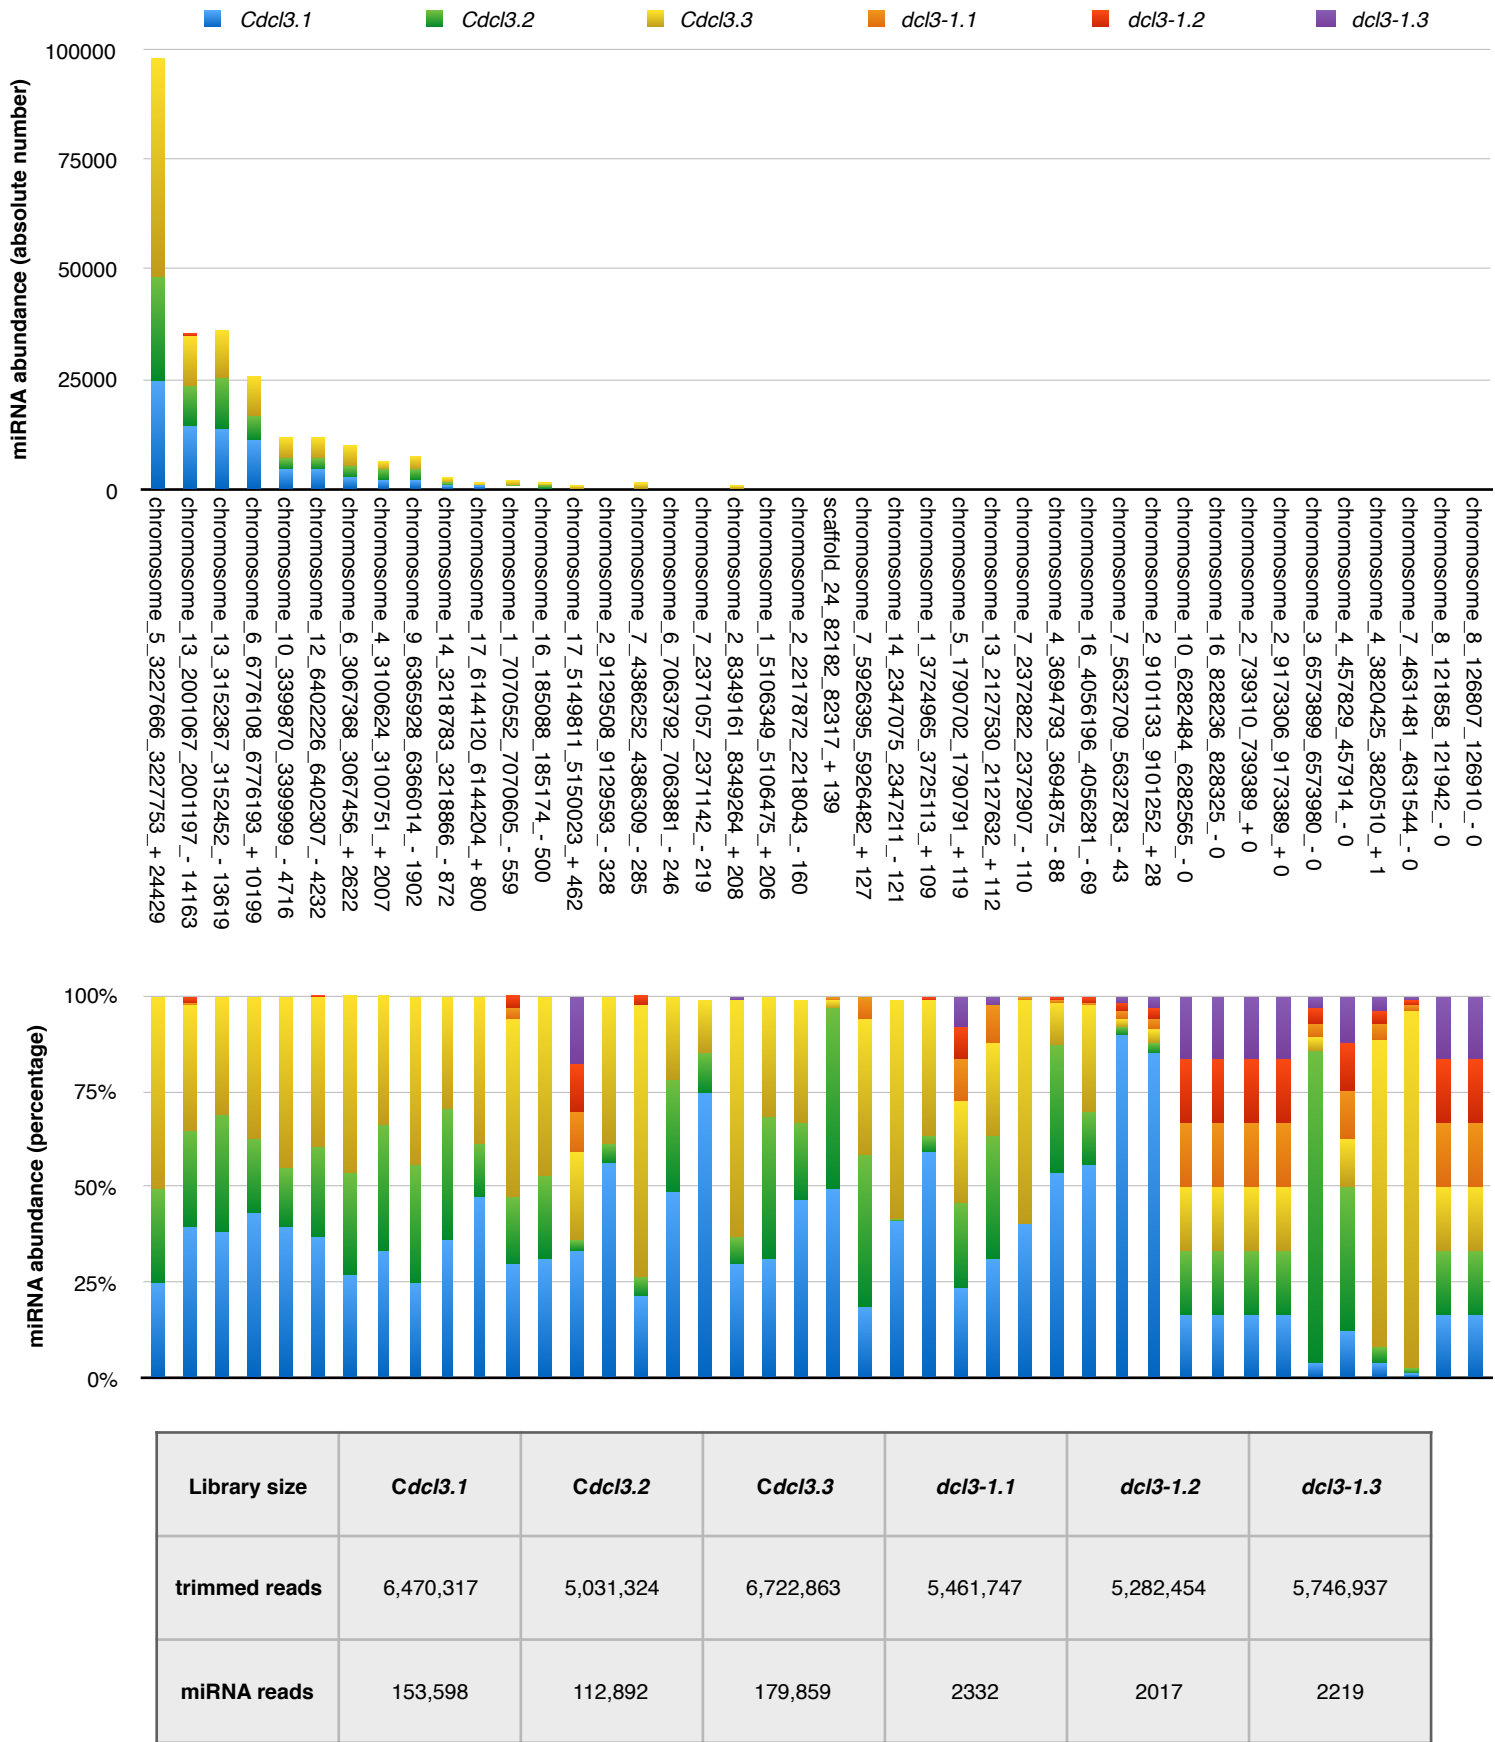

### Supplementary Figure 5: miRNA quantification

Absolute (top) and relative (bottom) quantification for all known positive-strand miRNA reads detected in all corresponding sRNA-seq libraries. Sequencing and miRNA alignment statistics for each library are in the table below.

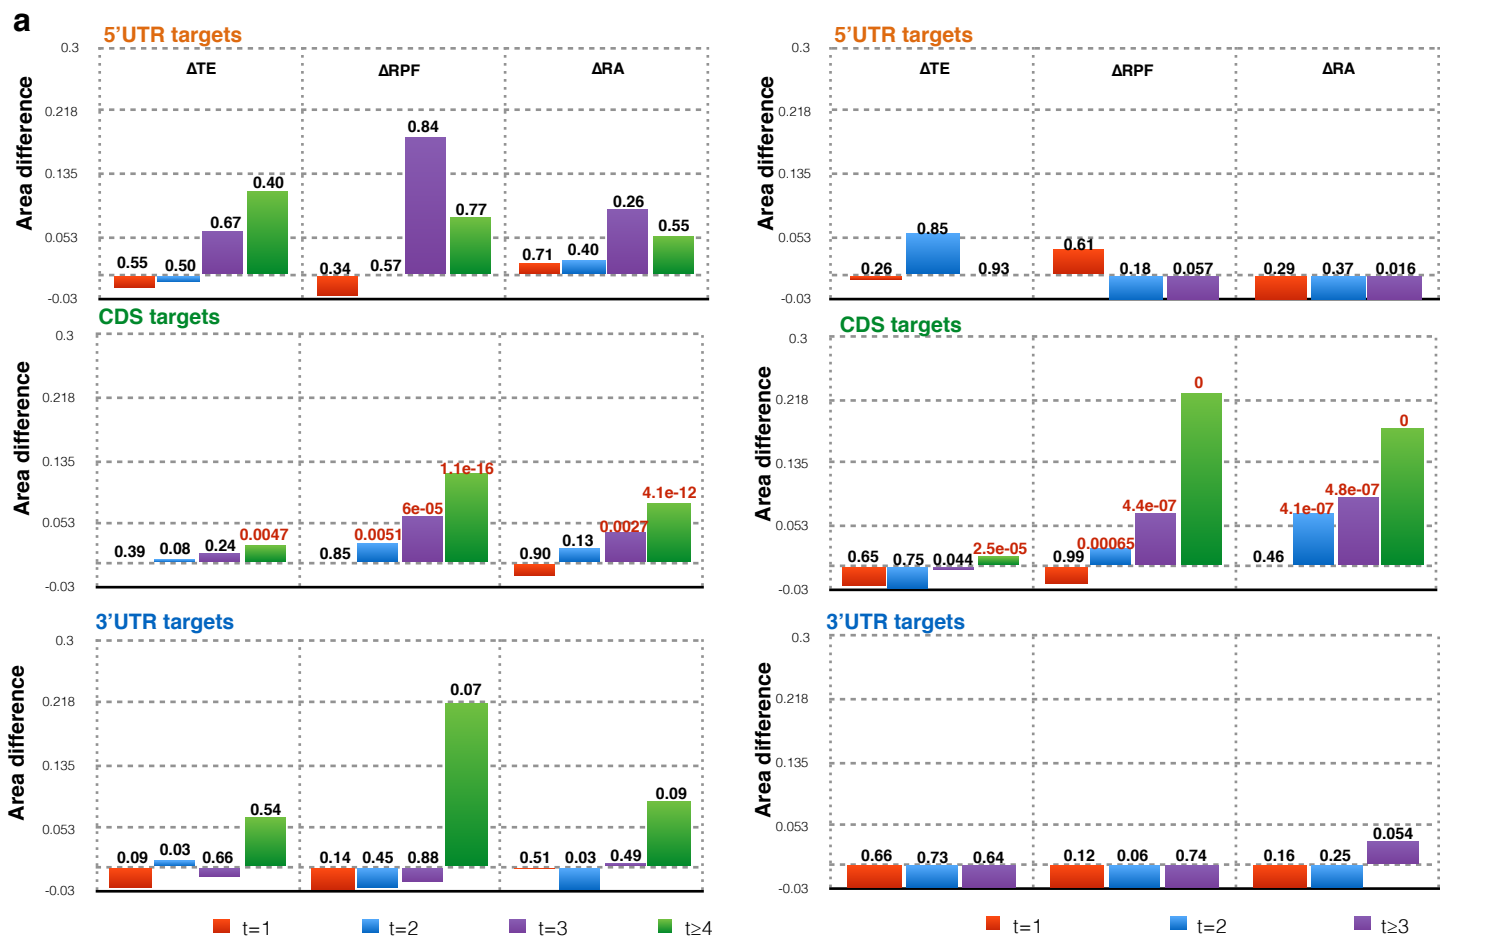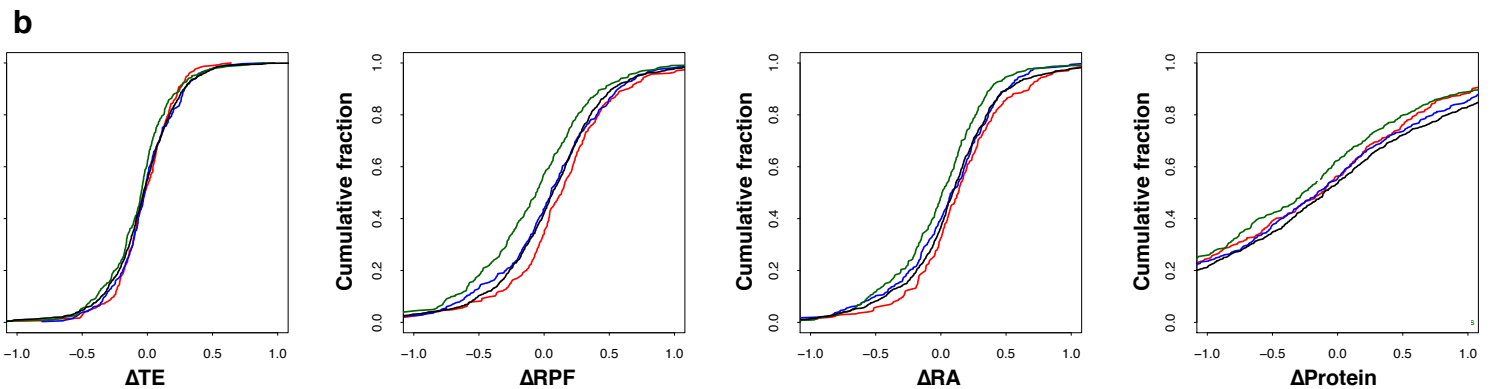

| p-value with non-target (n=911) comparisons | TE   | RPF     | RNA    | Protein |
|---------------------------------------------|------|---------|--------|---------|
| 1 target site (n = 471)                     | 0.16 | 0.013   | 0.26   | 0.12    |
| 2 target sites (n = 297)                    | 0.57 | 0.73    | 0.49   | 0.85    |
| ≥4 target sites (n = 187)                   | 0.05 | 5.3E-05 | 0.0026 | 0.043   |

### Supplementary Figure 6:

(a) Bar graph of differences between area under cumulative distribution of mRNA containing 1 (red), 2 (blue), 3 (purple) or 4 or more (green) 5'UTR, CDS or 3'UTR-exclusive target sites and non-target containing mRNAs. Significance (K.S. test) of the differences are indicated above each bar; p-values less than or equal to 0.01 are highlighted in red. Due to lower sequencing coverage, fewer mRNAs in the *ago3-25* and Parental strains passed the detection threshold, thus 5' and 3' UTR-exclusive targets containing three target sites were combined with those containing four or more target sites.

(b) Cumulative *dcl3-1* relative to *Cdcl3* log<sub>2</sub> fold-change distributions of ΔTE, ΔRPF, ΔRA and ΔProtein for genes with both NGS and proteomic support and with 0 (black), 1 (red), 2-3 (blue) or 4 or more (green) target sites. K.S. p-values are shown in the table below.

**C**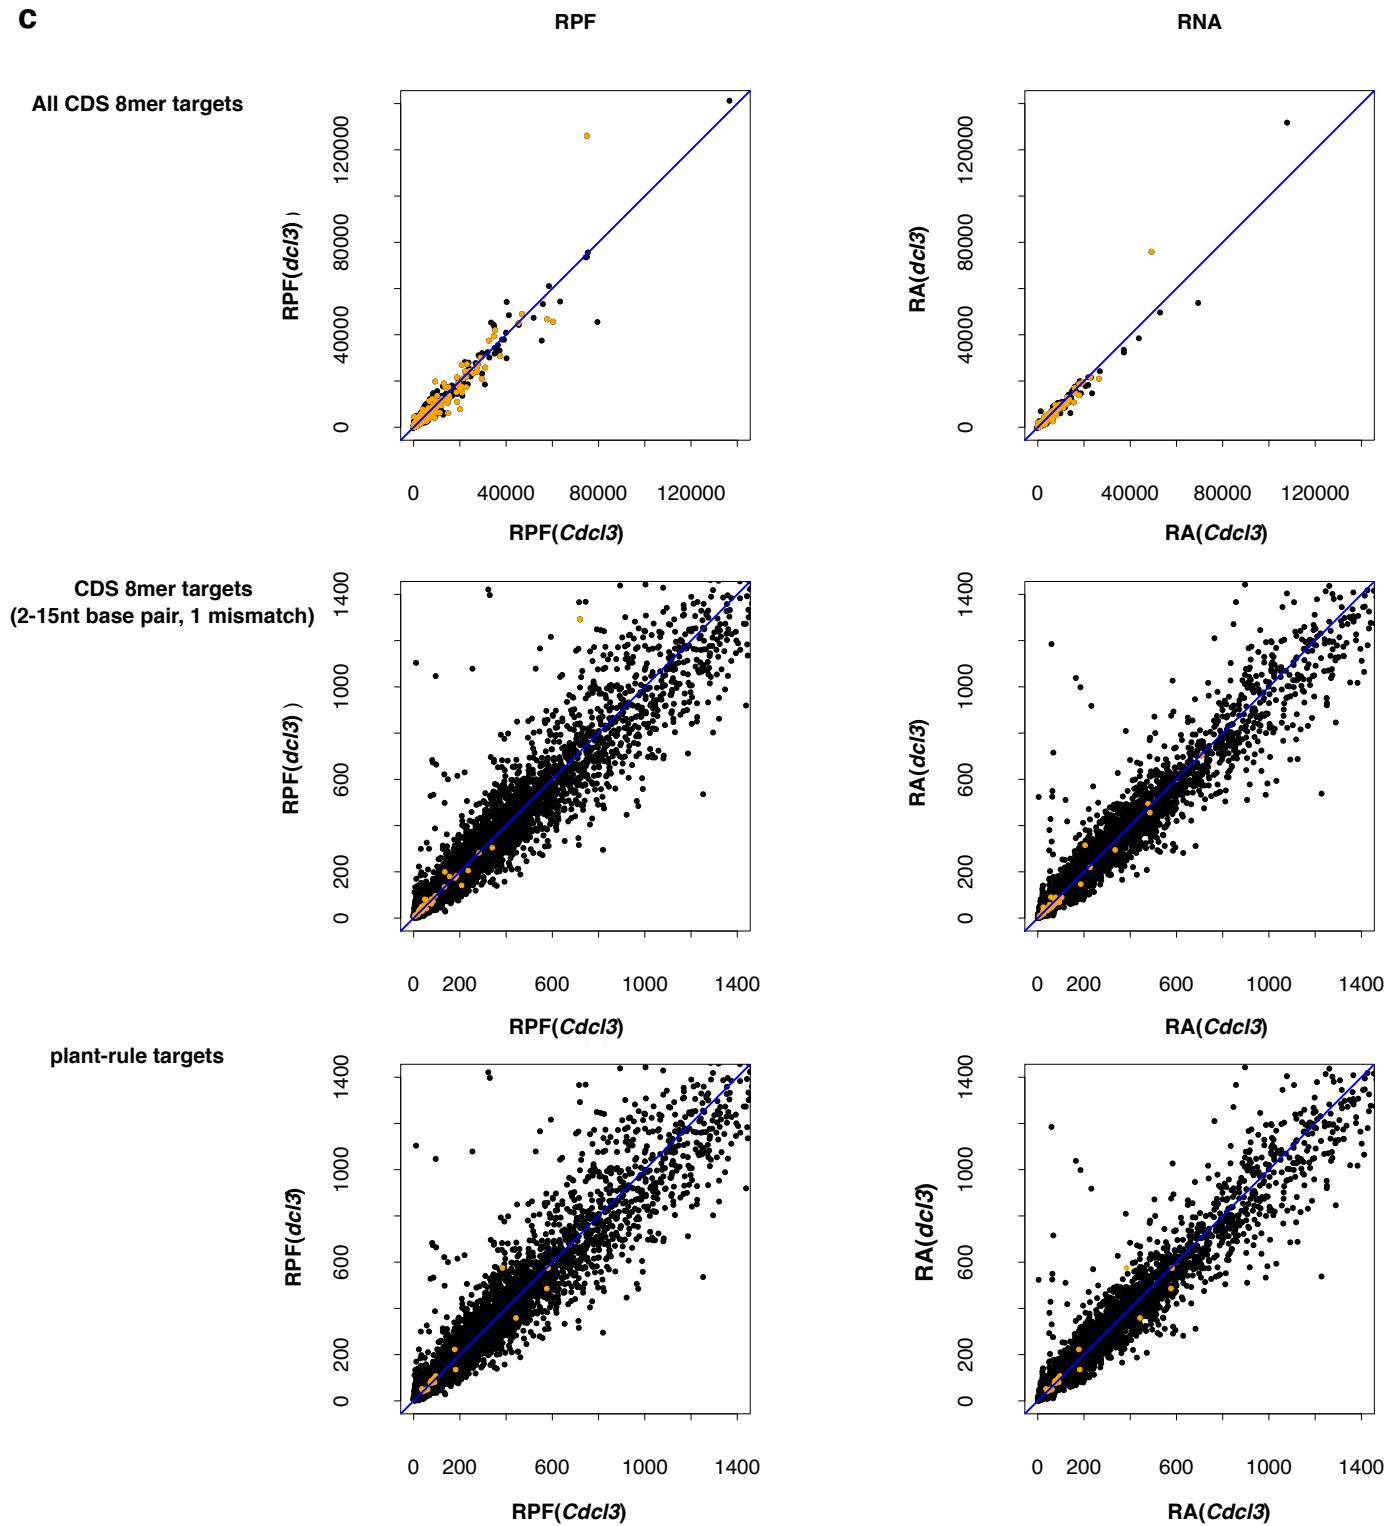**Supplementary Figure 6:**

(c) Correlation of TE, RPF and RNA (averaged over biological repeats) between *dcl3-1* and *Cdc13* for all expressed mRNAs (black), and for mRNAs with predicted target sites (orange). Top, middle and bottom panels represents, respectively, all CDS-exclusive 8mer targets, CDS-exclusive targets with a higher degree of pairing (i.e. 2-15 nt base pairing, allowing 1 mismatch), and CDS-exclusive targets based on the plant rule. The blue lines represent a perfect correlation.

d

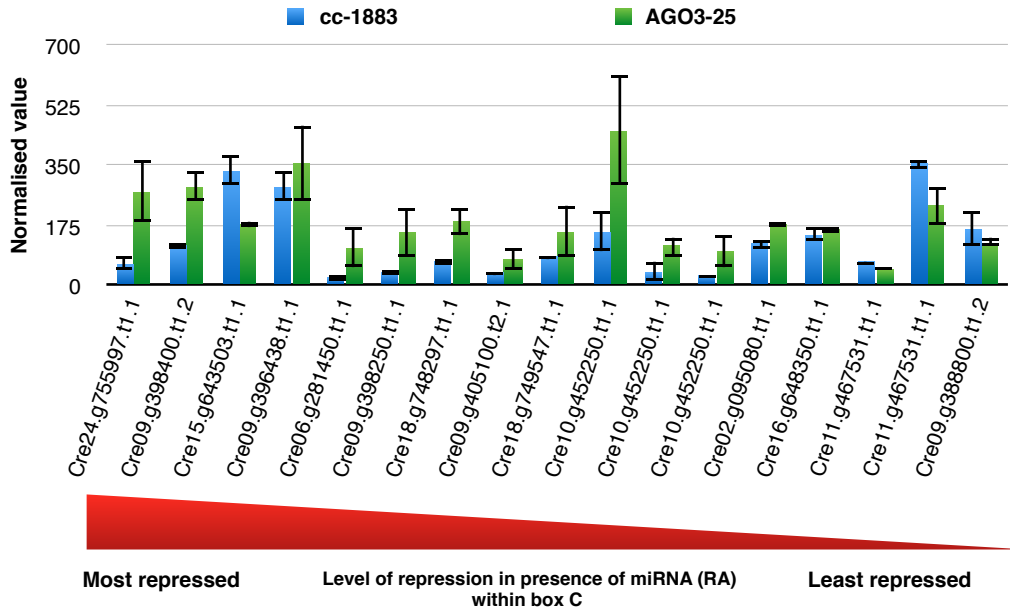

**Supplementary Figure 6:**

(d) Normalized mRNA expression in wild-type and *ago3-25*. Candidates are from box C of Figure 4A organized based on degree of repression in *Cdcl3* relative to *dcl3-1*. Normalized average expression and standard deviation are based on biological replicates.

**Supplementary table 3**

Lists of mRNAs lying within boxes A, A', B, B', C and C' (Figure 4A) and their respective annotations. Annotations associated with the 80S translation machinery are highlighted in green, and other RNA binding proteins in red. Messenger RNAs with detectable protein in the N15 proteomics data are highlighted in blue.

|                           |                                                                                  |
|---------------------------|----------------------------------------------------------------------------------|
| <b>A (32)</b>             |                                                                                  |
| Cre01.g034600.t1.2        | n/a                                                                              |
| Cre03.g165215.t1.1        | ubiquitin-like modifier-activating enzyme ATG7                                   |
| <b>Cre04.g222700.t1.2</b> | Elongation factor 3                                                              |
| Cre09.g408950.t1.1        | Autophagy-specific Gee 2, isoform A                                              |
| Cre09.g397450.t1.1        | Dimethylaniline Mnooxygenase                                                     |
| <b>Cre12.g504200.t1.2</b> | Ribosomal protein S23, component of cytosolic 80S ribosome and 40S small subunit |
| <b>Cre17.g701200.t1.2</b> | Ribosomal protein L14, component of cytosolic 80S ribosome and 60S large subunit |
| Cre08.g359450.t1.2        | D-Alanine Ligase                                                                 |
| Cre02.g093850.t1.1        | Ras supressor protein (contains leucine-rich repeats)                            |
| Cre11.g468353.t1.1        | SF14-voltage-gated potassium channel                                             |
| <b>Cre04.g214503.t1.1</b> | Ribosomal protein S12, component of cytosolic 80S ribosome and 40S small subunit |
| <b>Cre02.g091100.t1.2</b> | Ribosomal protein L15, component of cytosolic 80S ribosome and 60S large subunit |
| <b>Cre02.g106600.t1.2</b> | Ribosomal protein S19, component of cytosolic 80S ribosome and 40S small subunit |
| <b>Cre12.g498900.t1.2</b> | Ribosomal protein S7, component of cytosolic 80S ribosome and 40S small subunit  |
| Cre06.g299450.t1.2        | n/a                                                                              |
| Cre06.g280800.t1.2        | Nuclear auto antigenic sperm protein                                             |
| Cre07.g349950.t1.1        | Transcription initiation factor RFIID subunit 6                                  |
| <b>Cre12.g521200.t1.2</b> | DNA replication factor C complex subunit 1                                       |
| Cre17.g720300.t1.2        | Non-specific serine/threonine protein kinase                                     |
| <b>Cre06.g272950.t1.1</b> | Ribosomal protein S18, component of cytosolic 80S ribosome and 40S small subunit |
| Cre08.g385800.t1.1        | n/a                                                                              |
| Cre03.g174900.t1.1        | SARM1 (protein binding)                                                          |
| <b>Cre12.g494050.t1.2</b> | Ribosomal protein L9, component of cytosolic 80S ribosome and 60S large subunit  |
| Cre09.g399141.t1.1        | MFS transporter, ACS family, solute carrier family 17                            |
| Cre11.g467560.t1.1        | TPR repeat containing protein                                                    |
| Cre16.g660750.t1.1        | coiled-coil and C2 domain-containing protein 2A                                  |
| <b>Cre07.g357850.t1.2</b> | Ribosomal protein L22, component of cytosolic 80S ribosome and 60S large subunit |
| Cre01.g040850.t1.2        | G Protein-coupled receptor-related protein                                       |
| Cre01.g036800.t1.1        | Diacylglycerol kinase                                                            |
| Cre16.g661588.t1.1        | FAST Leu-Rich Domain-containing protein                                          |
| Cre07.g348550.t1.1        | CGI-141-related/Lipase containing protin                                         |
| Cre01.g023550.t1.1        | Flagellar Associated Protein, putative outer arm dynein light chain              |
| <b>B (3)</b>              |                                                                                  |
| Cre16.g675200.t1.1        | n/a                                                                              |
| Cre12.g541400.t1.2        | Las17-binding protein actin regulator (Ysc84)                                    |
| Cre16.g677920.t1.2        | n/a                                                                              |

|                                    |                                                  |
|------------------------------------|--------------------------------------------------|
| <b>C (15)</b>                      |                                                  |
| Cre02.g095080.t1.1                 | Major vault protein                              |
| Cre03.g155950.t1.2                 | n/a                                              |
| Cre06.g281450.t1.1                 | Scavenger receptor cysteine rich (SRCR) protein  |
| Cre09.g388800.t1.2                 | Glutamate dehydrogenase                          |
| Cre09.g396438.t1.1                 | n/a                                              |
| Cre09.g398250.t1.1                 | n/a                                              |
| Cre09.g398400.t1.2                 | Transient receptor potential ion channel protein |
| Cre09.g405100.t2.1                 | n/a                                              |
| Cre10.g452250.t1.1                 | n/a                                              |
| <a href="#">Cre11.g467531.t1.1</a> | Flagellar Associated Protein                     |
| Cre15.g643503.t1.1                 | n/a                                              |
| Cre16.g648350.t1.1                 | Proline Oxidase                                  |
| Cre18.g748297.t1.1                 | n/a                                              |
| Cre18.g749547.t1.1                 | n/a                                              |
| Cre24.g755997.t1.1                 | Cell wall protein pherophorin-C18                |

|                    |                                                                       |
|--------------------|-----------------------------------------------------------------------|
| <b>A' (16)</b>     |                                                                       |
| Cre16.g668050.t1.1 | Aspartyl protease (Asp_protease_2)                                    |
| Cre06.g265850.t1.1 | Tail-specific/C-terminal processing peptidase protease                |
| Cre03.g191950.t1.2 | RimM N-terminal domain (RimM)                                         |
| Cre14.g614950.t1.2 | Putative mitochondrial ribosomal protein S2, imported to mitochondria |
| Cre12.g554300.t1.1 | Sodium:solute symporter                                               |
| Cre15.g639050.t1.1 | Zinc finger MYND domain containing protein 10                         |
| Cre14.g626800.t1.1 | n/a                                                                   |
| Cre14.g610663.t1.1 | n/a                                                                   |
| Cre06.g271950.t1.2 | General vesicular transport factor P115                               |
| Cre07.g318300.t1.1 | CAMP-dependent protein kinase regulatory chain                        |
| Cre17.g739850.t1.2 | n/a                                                                   |
| Cre10.g429200.t1.1 | RuBisCO methyltransferase                                             |
| Cre17.g703450.t1.1 | n/a                                                                   |
| Cre14.g623439.t1.1 | Pyroglutamyl-peptidase I                                              |
| Cre14.g626800.t1.1 | n/a                                                                   |
| Cre14.g622150.t1.1 | n/a                                                                   |

|                    |                                      |
|--------------------|--------------------------------------|
| <b>C' (3)</b>      | n/a                                  |
| Cre43.g760497.t1.1 | n/a                                  |
| Cre17.g734200.t1.2 | L,L-diaminopimelate aminotransferase |
| Cre17.g734100.t1.2 | n/a                                  |



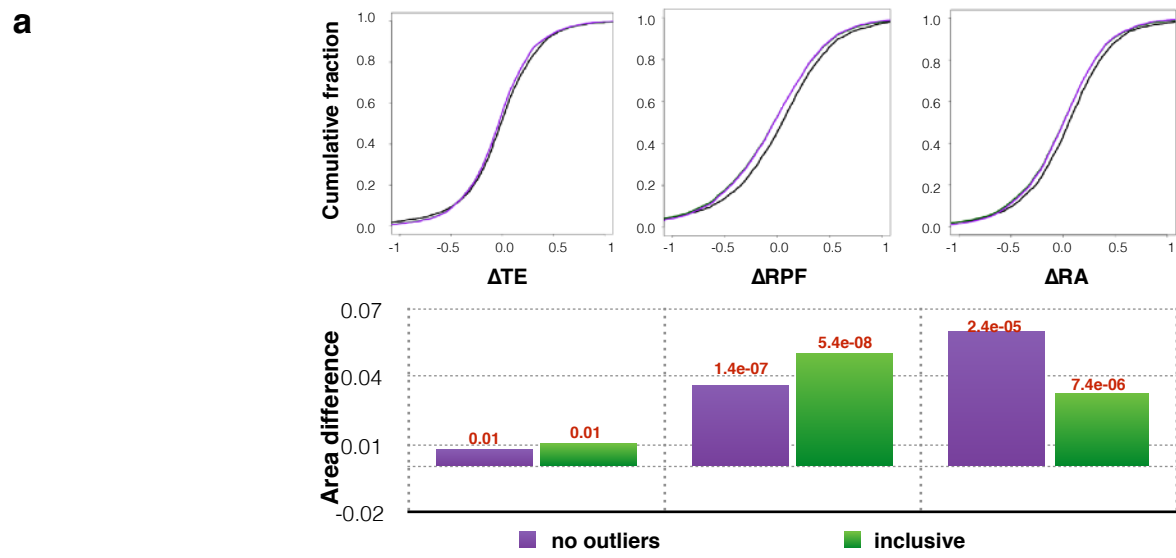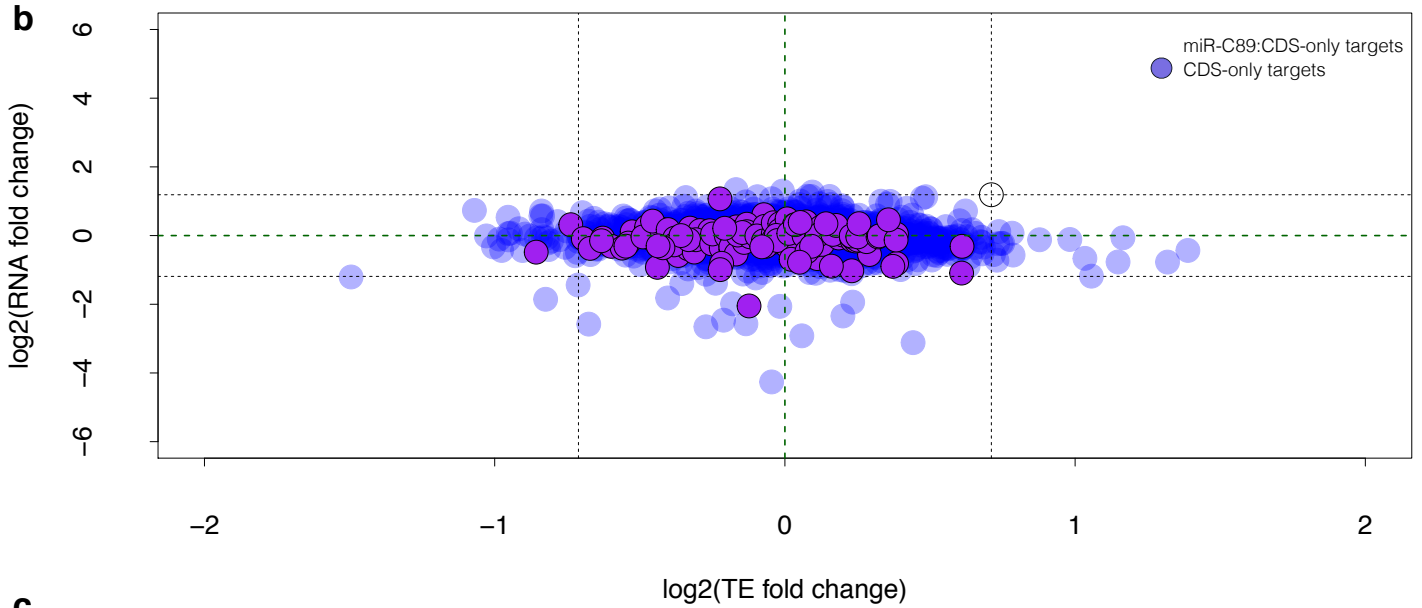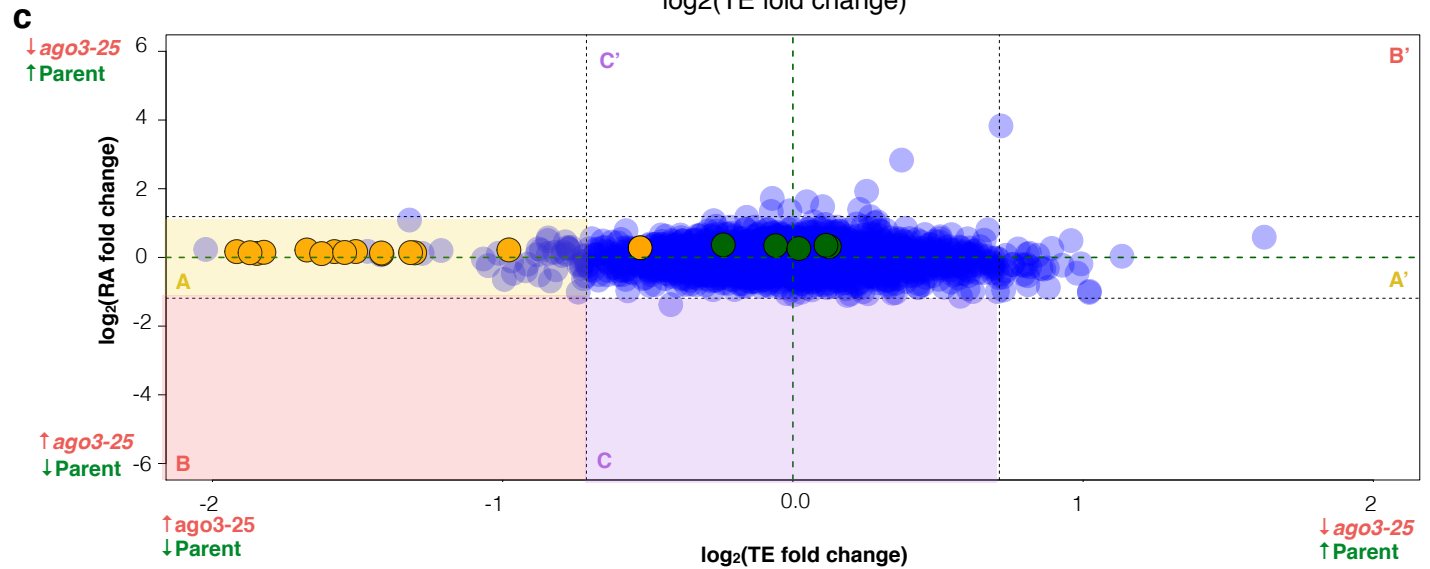

### Supplementary Figure 7

(a) Top panels show cumulative distributions of  $\Delta$ TE (left),  $\Delta$ RPF (middle) and  $\Delta$ RA (right)  $\log_2$  fold changes for CDS-exclusive targets in *dcl3-1* relative to *Cdcl3*. Colors indicate CDS-exclusive targets (green), CDS-exclusive targets excluding strongly differentially expressed mRNAs (i.e. mRNAs in box A, A', B, B', C and C' in Figure 4A) (purple), and mRNAs without target sites (black). The bar graphs in the bottom panel show differences between areas under the corresponding cumulative distributions of target-site containing mRNA and non targets. Significance (K.S. test) of the differences are indicated above each bar; p-values less than or equal to 0.01 are highlighted in red.

(b) Scatter plot of  $\log_2$  fold changes of all CDS-exclusive targets for  $\Delta$ TE and  $\Delta$ RA between *dcl3-1* and *Cdcl3*. miR-C89 CDS-exclusive targets are highlighted in purple.

(c) Scatter plot of  $\log_2$  fold changes of all CDS-exclusive targets for  $\Delta$ TE and  $\Delta$ RA between *ago3-25* and the Parental strain. 80S and chloroplast ribosomal proteins are in orange and green, respectively.

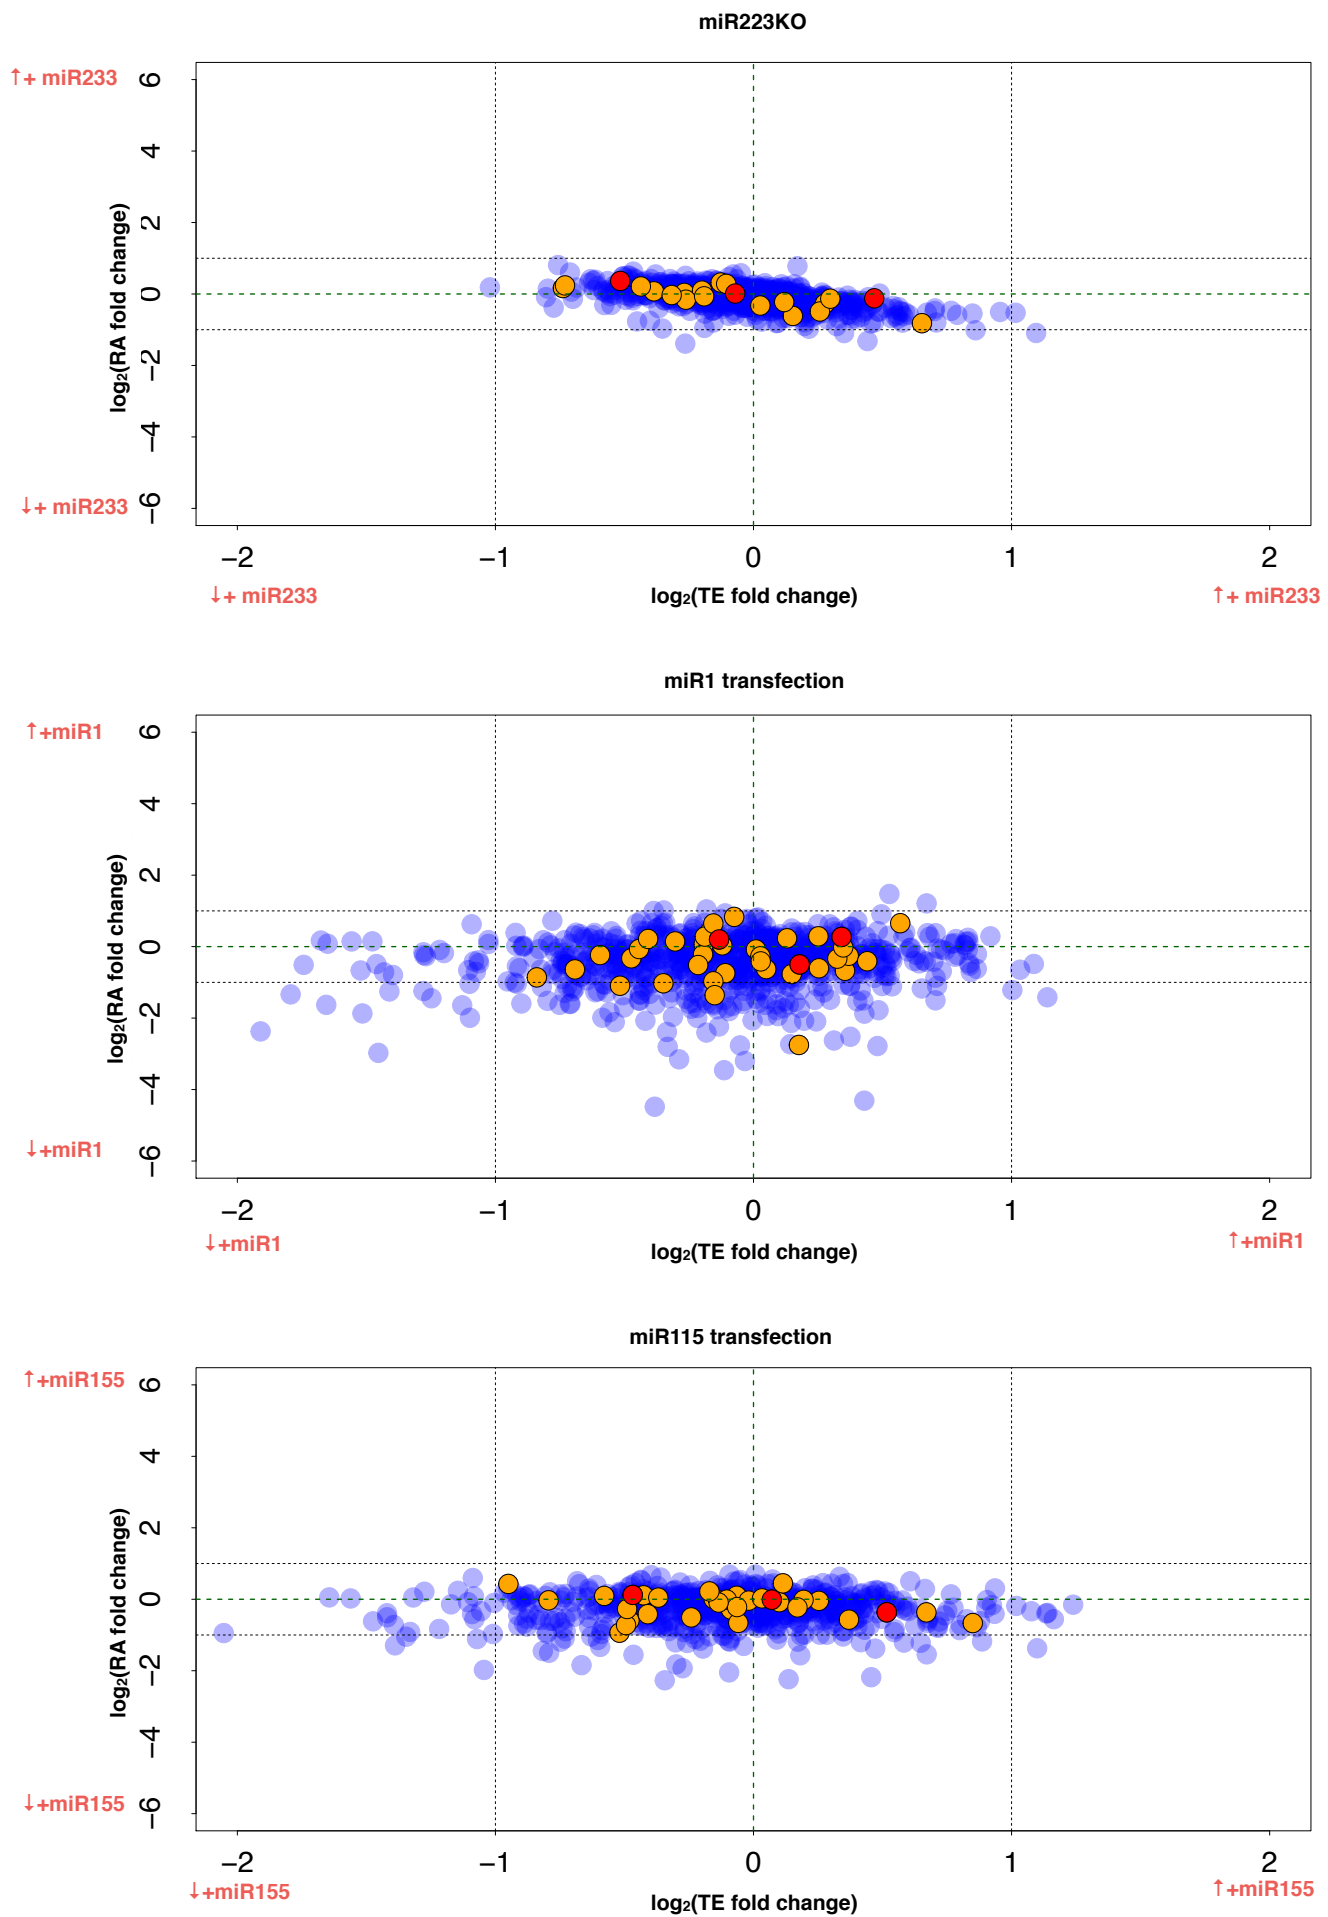

### Supplementary Figure 8

Correspondence between  $\Delta\text{TE}$  and  $\Delta\text{RA}$   $\log_2$  fold-changes after deleting miR-233 in mouse neutrophil cells (A), after introducing miR-1 to HEK293 cells (B), and after introducing miR-155 to HEK293 cells (C). Fold-change data were obtained from<sup>9</sup>.
